# Supplementary material
Source: PubMed Central journal article supplement (PMC6004099)

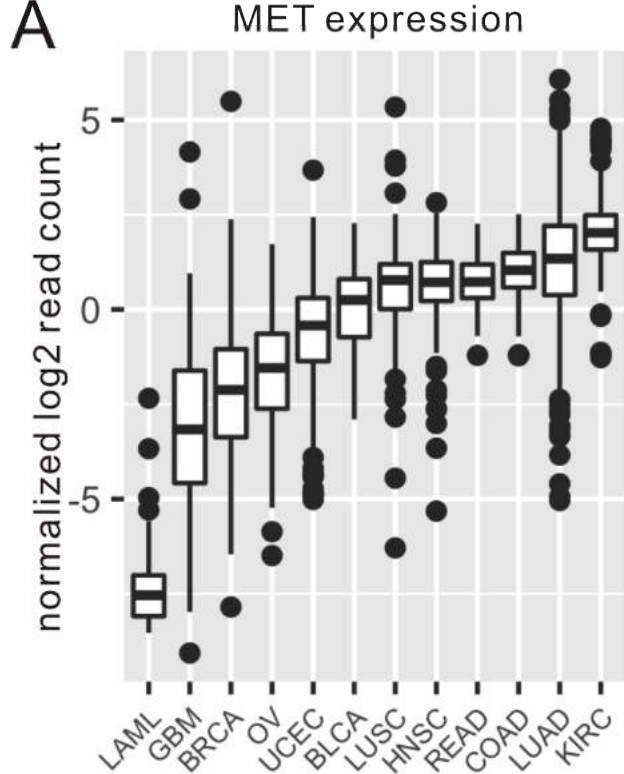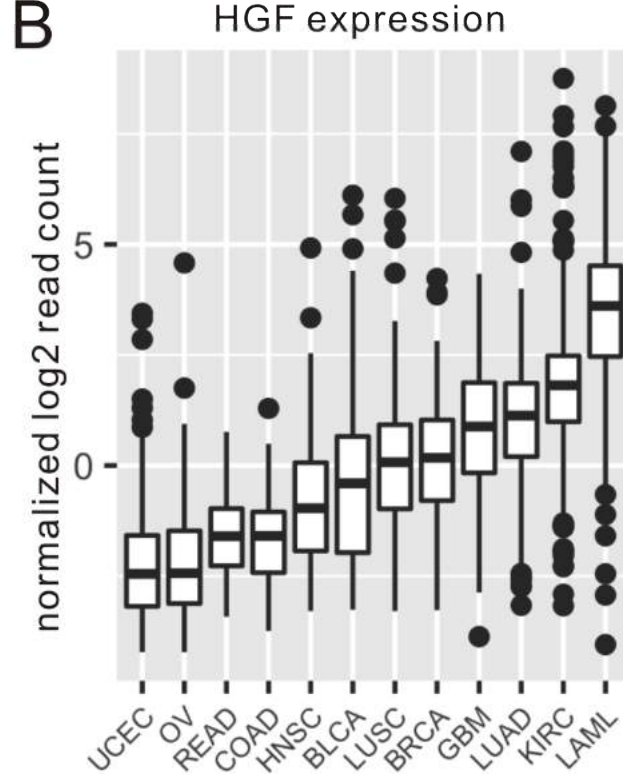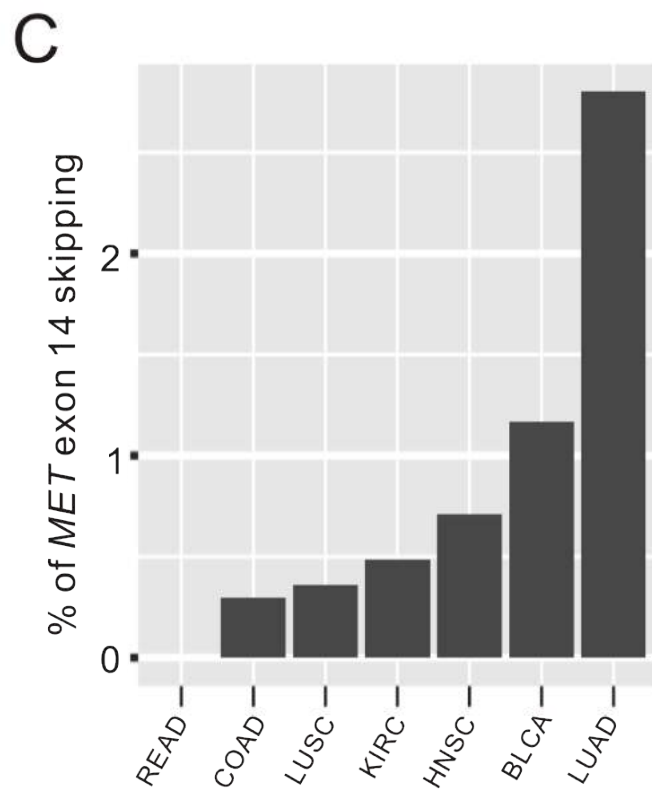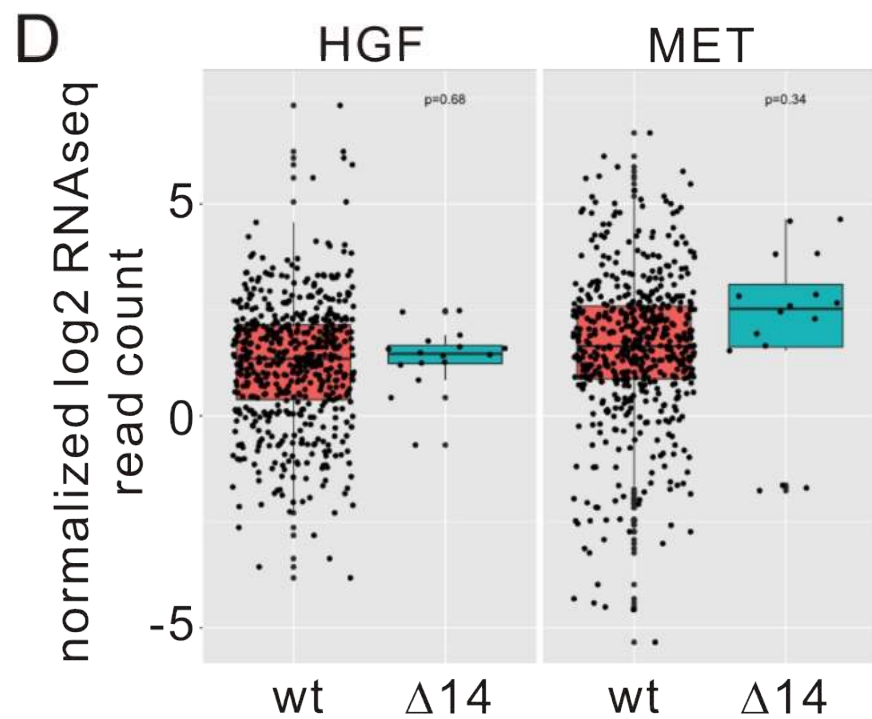

**A**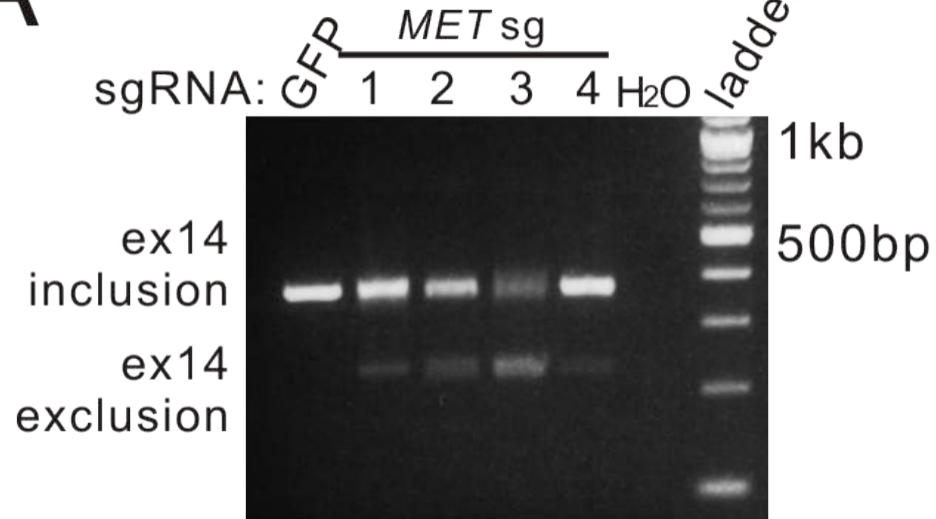**B**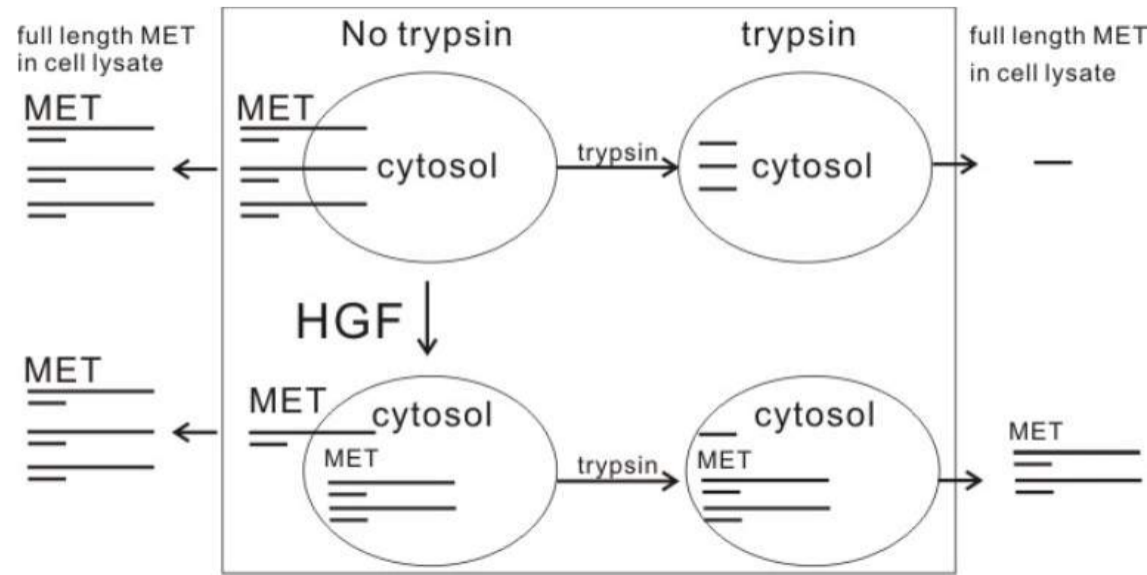

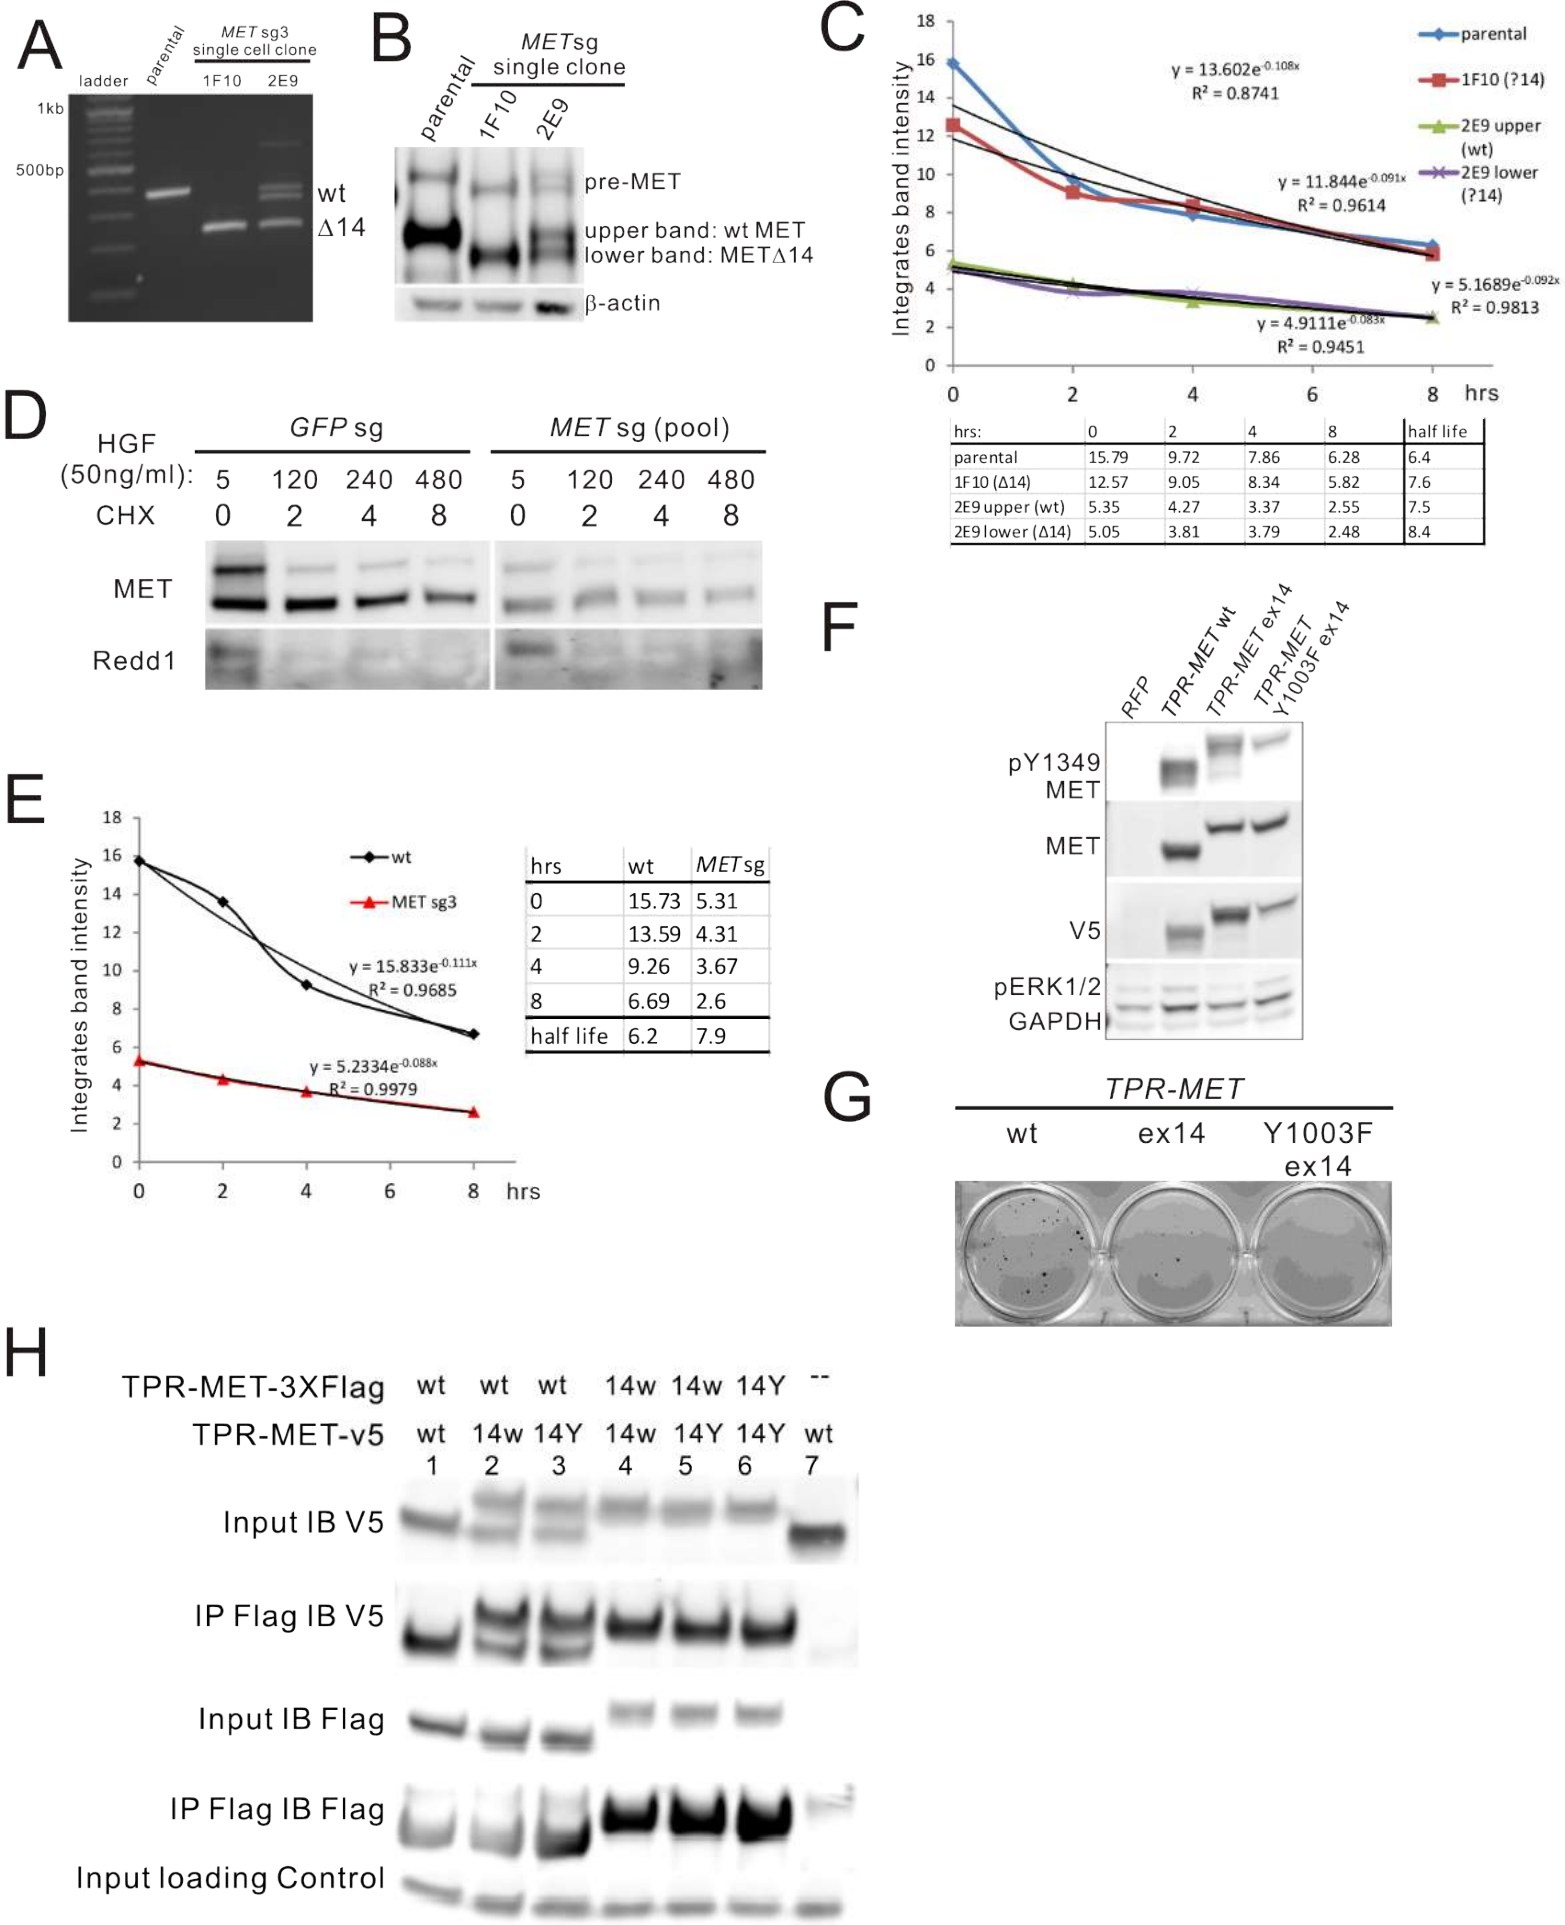

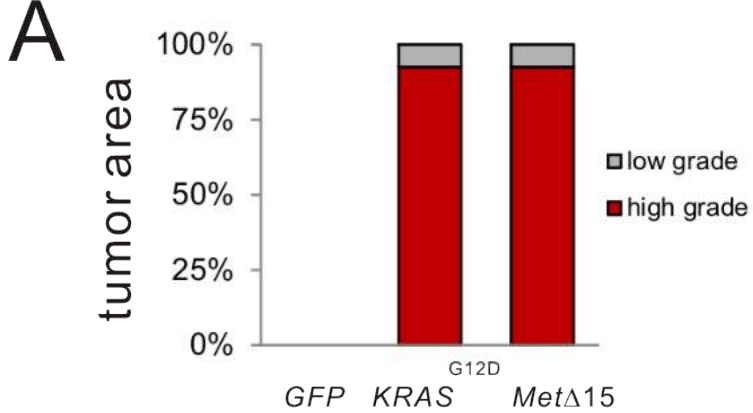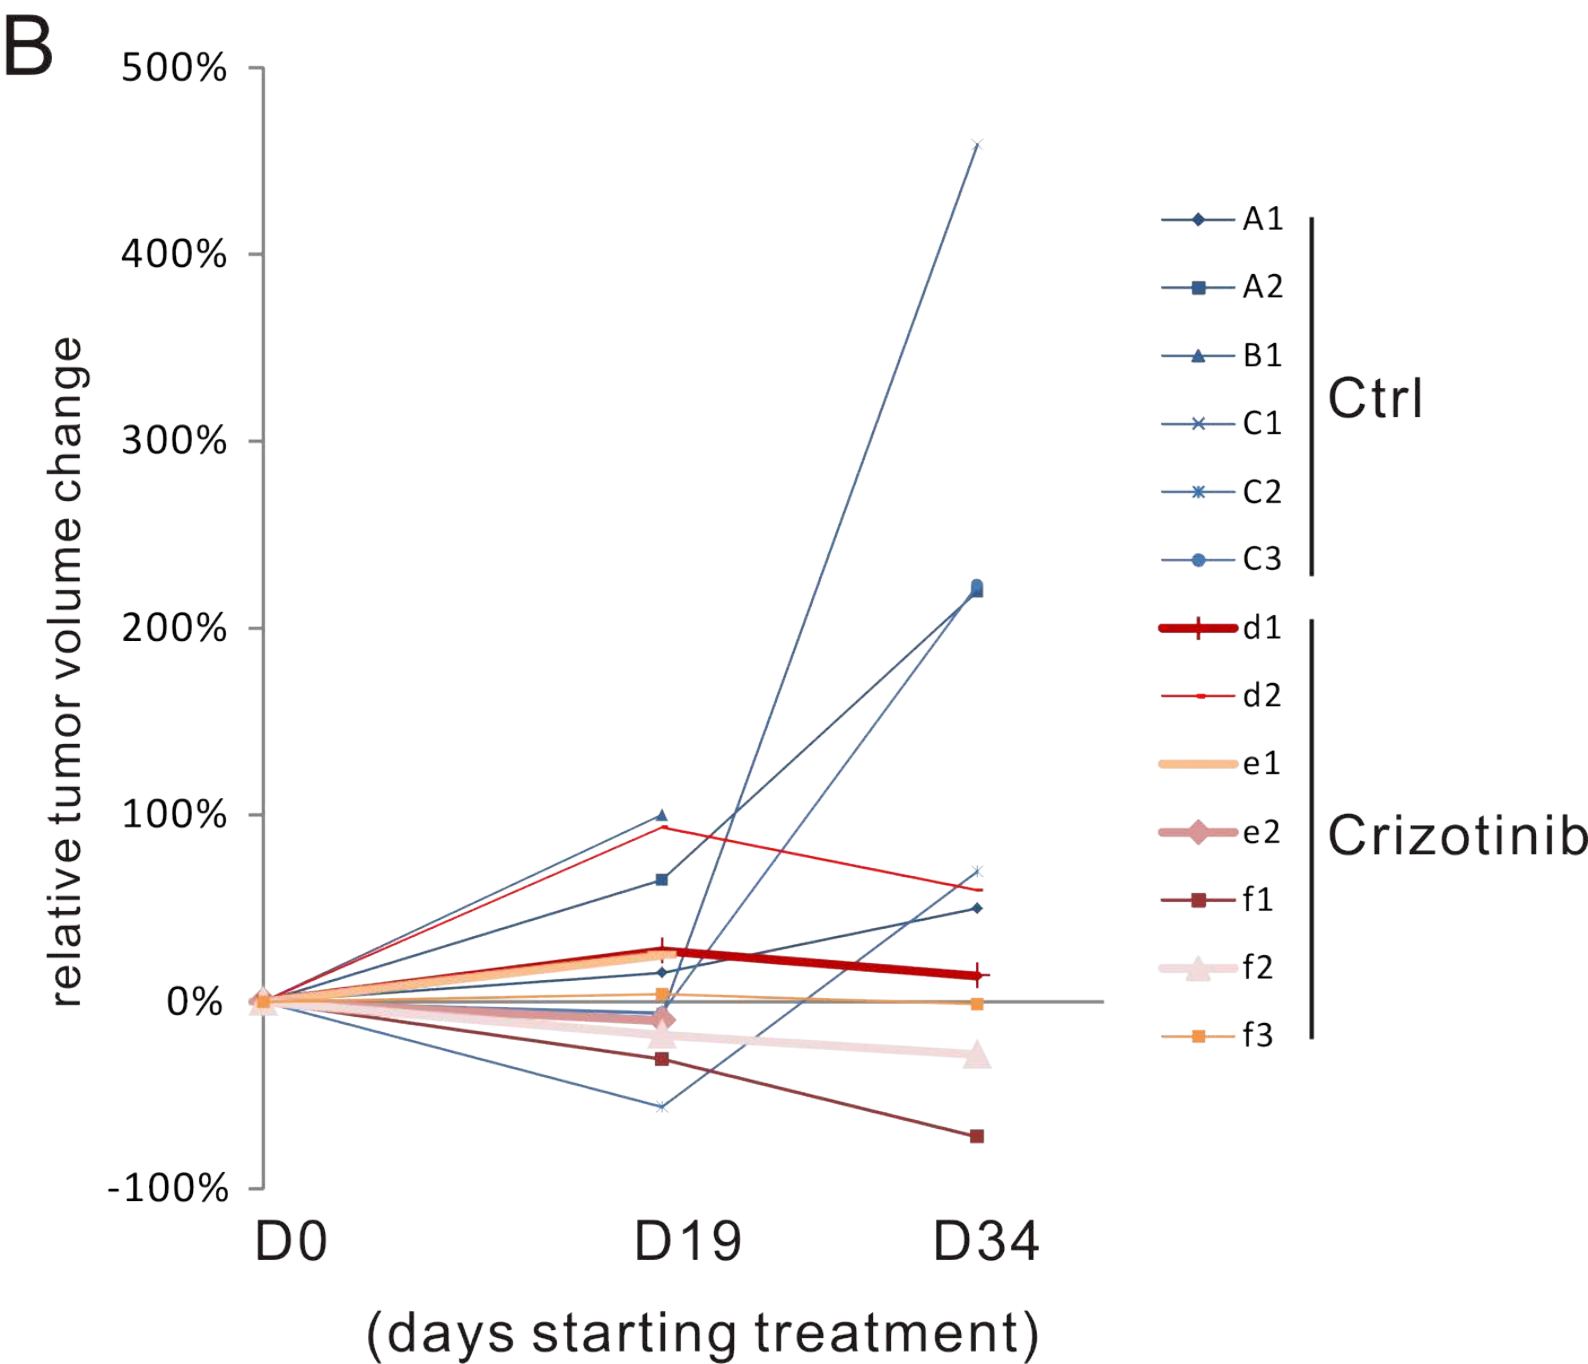

A

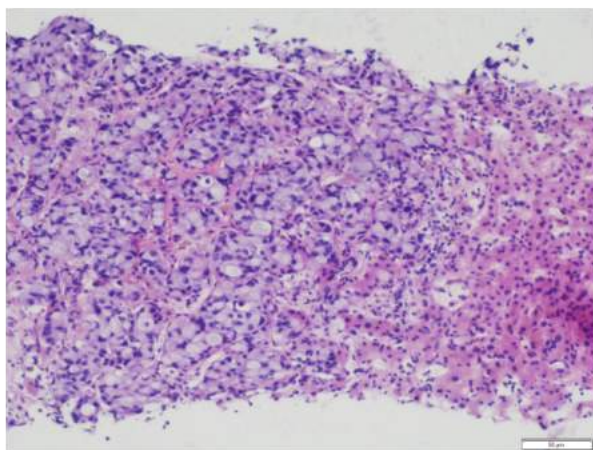

B

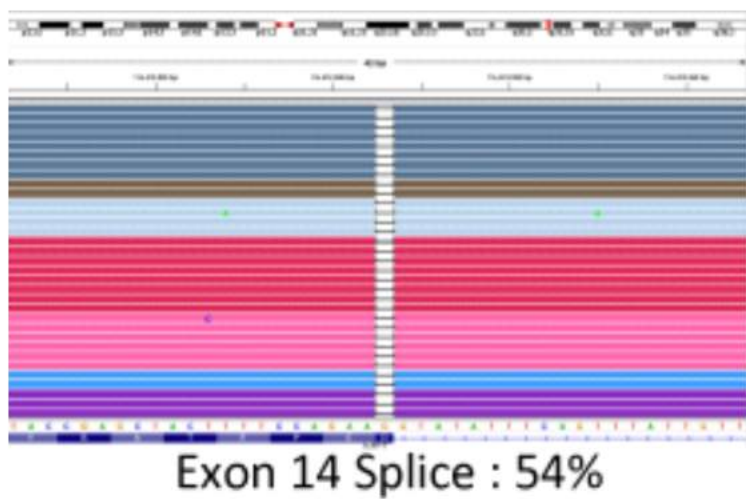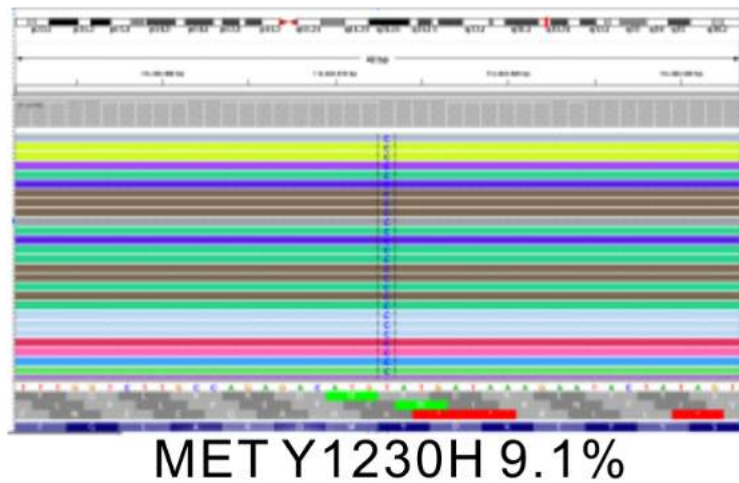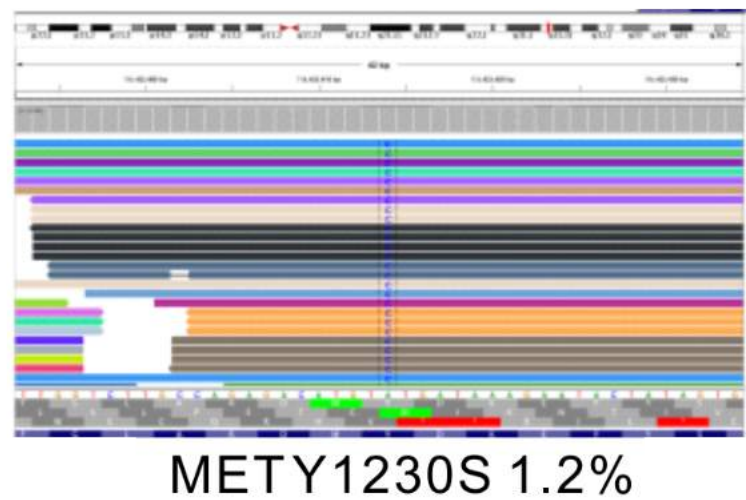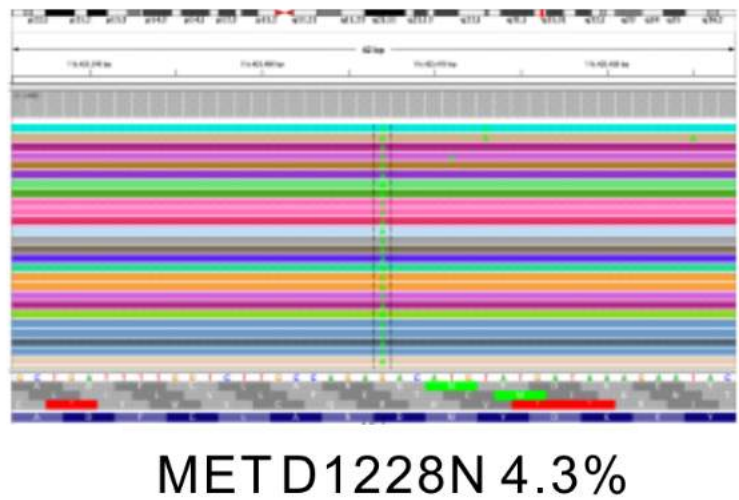

Supplement: NIHMS875726-supplement-4.pdf [file NIHMS875726-supplement-4.pdf]
